# Supplementary material for: Dawson type polyoxometalate based-poly ionic liquid supported on different carbon materials for high-efficiency oxidative desulfurization with molecular oxygen as the oxidant
Source: Royal Society of Chemistry journal article supplement (doi:10.1039/d0nj04526h), 2020-01-01
Supplement: d0nj04526h1.pdf [file d0nj04526h1.pdf]

**Dawson type polyoxometalate based-poly ionic liquid supported on different carbon materials for high-efficiency oxidative desulfurization with molecular oxygen as oxidant**

Yan Gao<sup>a</sup>, Ziyang Lv<sup>a</sup>, Ruimin Gao<sup>b</sup>, Guangfa Hu<sup>b</sup>, Jianshe Zhao<sup>a,1</sup>

<sup>a</sup> Key Laboratory of Synthetic and Natural Functional Molecule Chemistry of Ministry of Education, Shaanxi Key Laboratory of Physico-Inorganic Chemistry, College of Chemistry & Material Science, Northwest University, Xi'an, Shaanxi 710127, China

<sup>b</sup> Research Institute of Shaanxi Yanchang Petroleum Group Corp. Ltd., Xi'an 710075, China

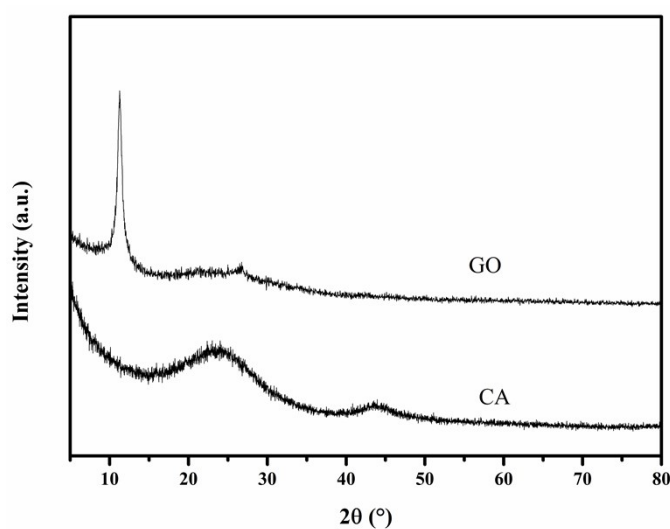

Fig. S1 XRD spectra of GO and CA

---

<sup>1</sup> Corresponding author.  
E-mail address: jszhao@nwu.edu.cn (Jianshe Zhao)

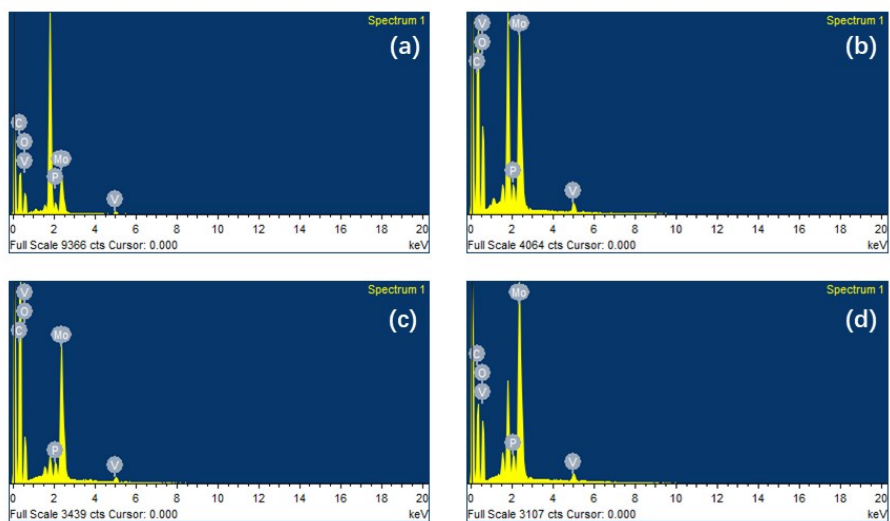

Fig. S2 EDX images of P[C<sub>2</sub>VP]MoV/AC (a), P[C<sub>2</sub>VP]MoV/CA (b) P[C<sub>2</sub>VP]MoV/CNTs (c) and P[C<sub>2</sub>VP]MoV/GO (d)

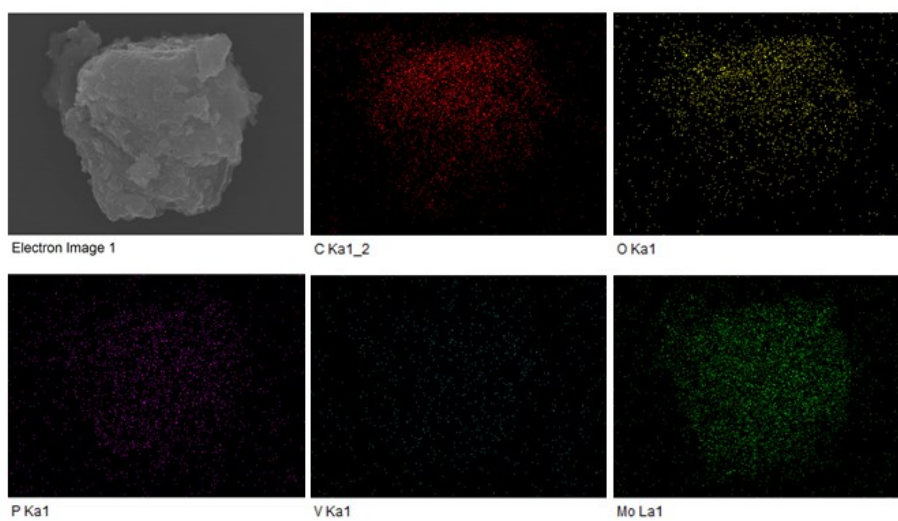

Fig. S3 EDX mapping for the P[C<sub>2</sub>VP]MoV/AC

Table S1 ICP-AES analysis of different catalysts

| sample                         | Element content (%) |      | content of MoV<br>(mmol/g) |
|--------------------------------|---------------------|------|----------------------------|
|                                | Mo                  | V    |                            |
| P[C <sub>2</sub> VP]MoV/AC     | 17.50               | 1.15 | 0.114                      |
| P[C <sub>2</sub> VP]MoV/CA     | 16.27               | 1.08 | 0.106                      |
| P[C <sub>2</sub> VP]MoV/CNTs   | 17.96               | 1.19 | 0.117                      |
| P[C <sub>2</sub> VP]MoV/GO     | 15.51               | 1.03 | 0.101                      |
| P[C <sub>2</sub> VP]MoV/CA-ac* | 11.04               | 0.71 | 0.071                      |

\* After eight consecutive catalytic reactions, the material was separated and tested.

Table S2 Adsorption performance of different desulfurization samples

|   |                              |     |
|---|------------------------------|-----|
| 1 | P[C <sub>2</sub> VP]MoV/AC   | 8.9 |
| 2 | P[C <sub>2</sub> VP]MoV/CA   | 9.4 |
| 3 | P[C <sub>2</sub> VP]MoV/CNTs | 1.3 |
| 4 | P[C <sub>2</sub> VP]MoV/GO   | 3.0 |
